# Supplementary material
Source: HighWire-hosted journal article supplement (https://cmaj.ca/highwire/filestream/59768/field_highwire_adjunct_files/2/151169-res-3-at.pdf)
Supplement: 151169-res-3-at.pdf [file 151169-res-3-at.pdf]

**Appendix 3 (as supplied by the authors): Chi-square models evaluating the associations between self-rated health, stress level, and household income with e-cigarette use.**

|                                   | Never used e-cigarettes<br>N (%) | Used e-cigarettes<br>N (%) | p      |
|-----------------------------------|----------------------------------|----------------------------|--------|
| <u>Overall health rating</u>      |                                  |                            | <0.001 |
| Excellent                         | 421 (22.0)                       | 32 (15.0)                  |        |
| Very good                         | 765 (40.1)                       | 76 (35.5)                  |        |
| Good                              | 594 (31.1)                       | 81 (37.9)                  |        |
| Fair                              | 118 (6.2)                        | 20 (9.4)                   |        |
| Poor                              | 12 (0.6)                         | 5 (2.3)                    |        |
| <u>Stress level rating</u>        |                                  |                            | <0.001 |
| Excellent                         | 645 (33.7)                       | 48 (22.3)                  |        |
| Very good                         | 691 (36.1)                       | 68 (31.6)                  |        |
| Good                              | 413 (21.6)                       | 69 (32.1)                  |        |
| Fair                              | 133 (7.0)                        | 20 (9.3)                   |        |
| Poor                              | 30 (1.6)                         | 10 (4.7)                   |        |
| <u>Estimated household income</u> |                                  |                            |        |
| Median income* (x \$1,000)        | 28.1±5.7                         | 26.2±5.6                   | 0.001  |
| Mean income* (x \$1,000)          | 36.1±10.7                        | 33.4±8.4                   | 0.001  |
| *For census division area         |                                  |                            |        |
